# Supplementary material for: The role of PD-L1 in patients with non-small cell lung cancer receiving neoadjuvant immune checkpoint inhibitor plus chemotherapy: a meta-analysis
Source: PubMed Central journal article supplement — Sci Rep. 2024 Oct 31;14:26200. doi: 10.1038/s41598-024-78159-y (PMC11527982; doi:10.1038/s41598-024-78159-y), 2024-10-31
Supplement: 41598_2024_78159_MOESM3_ESM.pdf [file 41598_2024_78159_MOESM3_ESM.pdf]

**1210P** **Neoadjuvant pembrolizumab (pembro) or placebo (pbo) plus chemotherapy and adjuvant pembro or pbo for early stage NSCLC: Subgroup analyses of the phase III KEYNOTE-671 study**

M.C. Garassino<sup>1</sup>, S. Gao<sup>2</sup>, M. Liberman<sup>3</sup>, J.D. Spicer<sup>4</sup>, K. Chen<sup>5</sup>, T. Vanakesa<sup>6</sup>, L. Thiberville<sup>7</sup>, F.D.F. Chaves<sup>8</sup>, G. Liu<sup>9</sup>, M. Okada<sup>10</sup>, H. Saji<sup>11</sup>, K. Laktionov<sup>12</sup>, A. Rittmeyer<sup>13</sup>, J. Bosch-Barrera<sup>14</sup>, R.D. Gentsler<sup>15</sup>, A.K. Ganti<sup>16</sup>, E. Jensen<sup>17</sup>, S.M. Keller<sup>17</sup>, A. Samkari<sup>17</sup>, H. Wakelee<sup>18</sup>

<sup>1</sup>Department of Medicine, University of Chicago, Chicago, IL, USA; <sup>2</sup>Department of Oncology, Cancer Hospital Chinese Academy of Medical Sciences, Beijing, China; <sup>3</sup>Department of Oncology, Centre Hospitalier de Université de Montréal (CHUM), Montreal, QC, Canada; <sup>4</sup>Department of Oncology, McGill University, Montreal, QC, Canada; <sup>5</sup>Department of Oncology, Beijing Cancer Hospital, Peking University, Beijing, China; <sup>6</sup>Department of Oncology, North Estonia Medical Centre, Tallinn, Estonia; <sup>7</sup>Department of Oncology, CHU de Rouen, Rouen, France; <sup>8</sup>Department of Oncology, Instituto do Cancer do Ceará, Fortaleza, Brazil; <sup>9</sup>Department of Oncology, Princess Margaret Cancer Centre, Toronto, ON, Canada; <sup>10</sup>Department of Oncology, Hiroshima University Hospital, Hiroshima, Japan; <sup>11</sup>Department of Oncology, St. Marianna University School of Medicine Hospital, Kawasaki, Japan; <sup>12</sup>Department of Oncology, N.N. Blokhin National Medical Research Center of Oncology of the Ministry of Health of the Russian Federation, Moscow, Russian Federation; <sup>13</sup>Department of Oncology, LKI Lungenfachklinik Immenhausen, Immenhausen, Germany; <sup>14</sup>Department of Oncology, Catalan Institute of Oncology (ICO), Hospital Universitari Doctor Josep Trueta, IDIBGI-CERCA, Girona, Spain; <sup>15</sup>Department of Oncology, University of Virginia Comprehensive Cancer Center, Charlottesville, VA, USA; <sup>16</sup>Department of Oncology, VA Nebraska Western Iowa Health Care System and University of Nebraska Medical Center, Omaha, NE, USA; <sup>17</sup>Department of Oncology, Merck & Co., Inc., Rahway, NJ, USA; <sup>18</sup>Department of Oncology, Stanford University School of Medicine, Stanford Cancer Institute, Stanford, CA, USA

**Background:** Neoadjuvant pembro + chemo followed by adjuvant pembro significantly improved event-free survival (EFS) and OS vs neoadjuvant chemo alone in patients (pts) with resectable NSCLC in the phase III KEYNOTE-671 study. At interim analysis 2 (IA2), HRs (95% CI) were 0.59 (0.48–0.72) for EFS and 0.72 (0.56–0.93) for OS. We present EFS and OS results for key pt subgroups based on IA2.

**Methods:** Eligible pts with resectable stage II, IIIA, or IIIB (N2) NSCLC per AJCC 8 were randomized 1:1 to 4 cycles of pembro 200 mg or pbo + cisplatin-based chemo followed by surgery and adjuvant pembro or pbo for up to 13 additional cycles. Dual primary endpoints were EFS by investigator assessment per RECIST v1.1 and OS. Randomization was stratified by disease stage (II vs III), PD-L1 TPS (<50% vs ≥50%), histology (squamous vs nonsquamous), and region (East Asia vs non-East Asia). Exploratory analyses of EFS and OS were done using a Cox regression model with treatment as a covariate for preplanned subgroups based on PD-L1 TPS, disease stage, nodal involvement, and histology at baseline. Landmark analyses of EFS and OS from time of initiation of adjuvant therapy were also done.

**Results:** 797 pts were randomized to the pembro arm (N = 397) or the pbo arm (N = 400). Median study follow-up at IA2 (data cutoff, July 10, 2023) was 36.6 mo (range, 18.8–62.0). HRs for EFS and OS favored the pembro arm across all subgroups evaluated (Table). Among pts who started adjuvant therapy, HRs (95% CI) for EFS and OS from the start of adjuvant therapy were 0.55 (0.42–0.72; N = 548) and 0.71 (0.49–1.03; N = 557), respectively.

| Table: 1210P          |     |                  |                  |
|-----------------------|-----|------------------|------------------|
|                       | N   | EFS HR (95% CI)  | OS HR (95% CI)   |
| Stage II at baseline  | 239 | 0.59 (0.40–0.88) | 0.67 (0.41–1.10) |
| Stage III at baseline | 558 | 0.58 (0.46–0.72) | 0.74 (0.55–0.98) |
| Squamous histology    | 344 | 0.51 (0.38–0.69) | 0.71 (0.51–0.99) |
| Nonsquamous histology | 453 | 0.66 (0.51–0.86) | 0.73 (0.50–1.06) |
| PD-L1 TPS ≥50%        | 266 | 0.48 (0.33–0.71) | 0.55 (0.33–0.92) |
| PD-L1 TPS 1%–49%      | 242 | 0.52 (0.36–0.73) | 0.69 (0.44–1.07) |
| PD-L1 TPS ≥1%         | 508 | 0.51 (0.39–0.66) | 0.62 (0.45–0.87) |
| PD-L1 TPS <1%         | 289 | 0.75 (0.56–1.01) | 0.91 (0.63–1.32) |
| N0 status at baseline | 290 | 0.58 (0.41–0.80) | 0.70 (0.46–1.05) |
| N1 status at baseline | 152 | 0.56 (0.35–0.91) | 0.74 (0.41–1.33) |
| N2 status at baseline | 355 | 0.63 (0.48–0.82) | 0.74 (0.51–1.07) |

**Conclusions:** Perioperative pembro provided a clinically meaningful improvement in EFS and OS across subgroups vs neoadjuvant chemo alone in pts with resectable stage II, IIIA, or IIIB NSCLC. Results from the landmark analyses from time of adjuvant therapy start suggest adjuvant therapy adds clinical benefit in this setting.

**Clinical trial identification:** NCT03425643; EudraCT 2017-001832-21.

**Editorial acknowledgement:** Medical writing assistance was provided by Christabel Wilson, MSc, of ICON plc (Blue Bell, PA, USA). This assistance was funded by Merck Sharp & Dohme LLC, a subsidiary of Merck & Co., Inc., Rahway, NJ, USA.

**Legal entity responsible for the study:** Merck Sharp & Dohme LLC, a subsidiary of Merck & Co., Inc., Rahway, NJ, USA.

**Funding:** Merck Sharp & Dohme LLC, a subsidiary of Merck & Co., Inc., Rahway, NJ, USA.

**Disclosure:** M.C. Garassino: Financial Interests, Personal, Advisory Board: Eli Lilly, SeaGen International GmbH, Eli Lilly, Incyte, GSK, Bayer Healthcare Pharmaceuticals, Blueprint Medicines, AstraZeneca UK, AstraZeneca and Daiichi Sankyo Oncology Teams, Roche, Daiichi Sankyo, Mirati Therapeutics, Inc, Daiichi Sankyo/AstraZeneca, AstraZeneca Poland, Daiichi Sankyo, Inc., MSD, Eli Lilly, Pfizer, AstraZeneca/MedImmune, Sanofi Genzyme corporation, Sanofi / Prex, Regeneron Pharmaceuticals, Eli Lilly, Mirati Therapeutics, Inc.; Financial Interests, Personal, Invited Speaker: WebMD, WebMD Oncology/Takeda, MSD Italia, Srl, GrupoPacífico-Secretaría Técnica ICAPEM/AstraZeneca, S.O.S S.r.l., Medscape, ecancer, Ideology; Financial Interests, Personal, Invited Speaker, Global Experts Meeting: AstraZeneca; Financial Interests, Personal, Other, AstraZeneca SPAIN: Invitation to a lung cancer investigator meeting: AstraZeneca; Financial Interests, Personal, Advisory Board, Advisory Boards: Takeda, Daiichi Sankyo, BeiGene; Financial Interests, Personal, Other, PA-CIFIC-R Global Scientific Committee: AstraZeneca; Financial Interests, Personal, Other, Steering Committee member and Co-chair at the AstraZeneca Lung Cancer Summit 2019: AstraZeneca; Financial Interests, Personal, Other, MK-3475 KN671 Steering Committee.: MSD; Financial Interests, Personal, Other, Pacific 6 International Coordinating Investigator: AstraZeneca; Financial Interests, Personal, Other, Janssen Scientific Advisory Board and Therapeutic Area Steering Committee Meeting on Lung Cancer: Janssen; Financial Interests, Personal, Other, Pfizer Global Lung Cancer Educational Programme - Steering Committee: Pfizer; Financial Interests, Personal, Other, Seattle Genetics Lung Cancer Platform Study: Seattle Genetics; Financial Interests, Personal, Other, GSK Lung Cancer Global Council: GSK; Financial Interests, Personal, Other, PACIFIC-R Scientific Committee: AstraZeneca UK; Financial Interests, Personal, Other, GSK-Garassino-ZEAL Steering Committee 2020-23: GSK; Financial Interests, Personal, Advisory Board: AbbVie, Abion, Bayer; Financial Interests, Personal, Advisory Board, Advisory boards: Merck, Sanofi, Gilead; Financial Interests, Personal, Invited Speaker, Satellite Symposium: merck; Financial Interests, Personal, Invited Speaker, Invited speaker: Medscape; Financial Interests, Personal, Advisory Board, Invited speaker: OncoHost; Financial Interests, Personal, Advisory Board, Advisor: Boehringer Ingelheim; Financial Interests, Personal, Steering Committee Member, Member of the MK-3475 KN671 Steering Committee (KEYNOTE-671): MSD; Financial Interests, Personal, Coordinating PI, Coordinating investigator for the MK-3475 KEYNOTE 189: MSD; Financial Interests, Personal and Institutional, Coordinating PI, Pacific 6 Steering Committee and International Coordinating Investigator: AstraZeneca; Financial Interests, Institutional, Steering Committee Member, Steering Committee ML41118 Roche: Roche; Financial Interests, Institutional, Local PI, TURNING POINT: Bayer; Financial Interests, Institutional, Local PI, A Phase 1: Janssen; Financial Interests, Institutional, Local PI, Array 818-202: Pfizer; Financial Interests, Institutional, Local PI, PAPILLON Study: Janssen; Financial Interests, Institutional, Local PI, Phase II: Celgene Corporation, Spectrum Pharmaceuticals, Merck Serono; Financial Interests, Institutional, Local PI: Amgen; Financial Interests, Institutional, Local PI, Phase 3: Blueprint; Financial Interests, Institutional, Local PI, Phase III: Amgen, GSK Research & Development Ltd., Novartis; Financial Interests, Institutional, Local PI, Phase III - CEACAMS: Sanofi; Financial Interests, Institutional, Local PI, Phase I-JNJ-61186372, a Human Bispecific EGFR and cMet Antibody: Janssen; Financial Interests, Institutional, Local PI, Phase 3 Study RESILIENT: IPSEN Bioscience Inc.; Financial Interests, Institutional, Local PI, Phase II - SAVANNAH: AstraZeneca S.p.A.; Financial Interests, Institutional, Local PI, phase III NEOCOAST: MedImmune LCC; Financial Interests, Institutional, Local PI, Phase II - coast: MedImmune LCC; Financial Interests, Institutional, Local PI, Phase III - ADRIATIC: AstraZeneca; Financial Interests, Institutional, Local PI, Phase III (CANOPY-1): Novartis; Financial Interests, Institutional, Local PI, Phase 1b: Exelixis Inc.; Financial Interests, Institutional, Local PI, Phase 3-GO40241: Roche; Financial Interests, Institutional, Local PI, Phase III - CASPIAN: AstraZeneca; Financial Interests, Institutional, Local PI, MK3475-091 - PEARLS: Merck; Financial Interests, Institutional, Local PI, Phase III - ROCHE G029431: Roche; Financial Interests, Institutional, Local PI, Phase III CA209-017: BMS; Financial Interests, Institutional, Local PI, Phase III - ARCTIC: AstraZeneca; Financial Interests, Institutional, Local PI, Phase III - AURA 3: AstraZeneca AB; Financial Interests, Institutional, Local PI, Phase III CA209-057: BMS; Financial Interests, Institutional, Local PI, OPEL/2014/14/067: Otsuka Pharmaceutical Italy S.r.l.; Financial Interests, Institutional, Local PI, Phase II - VISION: Merck KGAA; Financial Interests, Institutional, Local PI, Phase III MK-3475-715: Incyte Corporation; Financial Interests, Institutional, Local PI, Phase 1/2 (TRIDENT-1): Turning Point Therapeutics, Inc.; Financial Interests, Institutional, Local PI, HERTHENA-Lung01: A Phase 2: Daiichi Sankyo Development Ltd.; Financial Interests, Institutional, Local PI, Phase II ATLANTIC: AstraZeneca S.p.A.; Financial Interests, Institutional, Local PI, Clinical trial: Affimed; Financial Interests, Institutional, Local PI, Clinical trial pizotinib: spectrum; Non-Financial Interests, Principal Investigator, STYLE Trial: Pfizer; Non-Financial Interests, Principal Investigator, Studio TYME: Eli Lilly; Non-Financial Interests, Principal Investigator, People: MSD; Non-Financial Interests, Principal Investigator, FAME trial: Istituto Nazionale dei Tumori; Non-Financial Interests, Principal Investigator, POST-ALK: Istituto Nazionale dei Tumori; Non-Financial Interests, Principal Investigator, Bando finalizzata Mesotelioma: Istituto Nazionale dei Tumori; Non-Financial Interests, Principal Investigator, TERAVOLT: Istituto Nazionale dei Tumori; Non-Financial Interests, Principal Investigator, Progetto Timoma: Istituto Nazionale dei Tumori; Non-Financial Interests, Principal Investigator, APOLLO: Istituto Nazionale dei Tumori; Non-Financial Interests, Principal Investigator, Beverly: Istituto dei Tumori Pascale - Napoli; Non-Financial Interests, Principal Investigator, IND227: Istituto dei Tumori Pascale - Napoli; Non-Financial Interests, Principal Investigator, RAMES: GOIRC; Non-Financial Interests, Principal Investigator, Studio CHANCE: GOIRC; Non-Financial Interests, Principal Investigator, Creta trial: Sant'Orsola Malpighi - Bologna (Alma Mater Studiorum Università Bologna); Non-Financial Interests, Principal Investigator, MILES 5: Istituto dei Tumori Pascale - Napoli; Non-Financial Interests, Principal Investigator, LIPI: GUSTAVE-ROUSSY PARIGI LIPI TRIAL: no profit; Non-Financial Interests, Principal Investigator: AO Spedali Civili Brescia; Non-Financial Interests, Principal Investigator, phase III trial: European Thoracic Oncology Platform (ETOP); Non-Financial Interests, Leadership Role, Honorary President and Founder: Women for Oncology Italy; Non-Financial Interests, Other, Member of ASCO Scientific Committee (2018-2021): ASCO; Non-Financial Interests, Leadership Role, Board member: AIOT (Associazione Italiana Oncologia Toracica); Non-Financial Interests, Member: AIOM, AIOT; Non-Financial Interests, Member, WCLC annual congress Lung Cancer Track: WCLC; Non-Financial Interests, Member, Scientific Committee: IPOP (Italian lung cancer charity), TUTOR (Italian thymic malignancies charity); Non-Financial Interests, Member, Member since 2013-2018: EMA Scientific Advisory Group (SAG); Non-Financial Interests, Other, Scientific Programme Committee: AACR; Non-Financial Interests, Leadership Role, previous ESMO National Societies Committee Chair and ESMO Council Member: ESMO; Other, Travel, Accommodations, Expenses: Pfizer; Other, Relationships to Disclose Travel, Accommodations, Expenses: Roche, AstraZeneca; Other, travel and accommodation: Merck. M. Liberman: Financial Interests, Personal, Advisory Board: Johnson & Johnson; Financial Interests, Personal, Stocks/Shares, CMO: Endocision, AssisiQ, Ditch Labs; Financial Interests, Local PI: Merck, AstraZeneca, Pfizer, BMS; Financial Interests, Research Grant: J&J. J.D. Spicer: Financial Interests, Personal, Advisory Board: AstraZeneca, Merck, Roche, BMS, Novartis, Amgen, Protalix Biotherapeutics, Xenetic Biosciences, Regeneron, Eisai; Financial Interests, Personal, Invited Speaker: AstraZeneca, Merck, BMS; Financial Interests, Institutional, Coordinating PI, In kind contribution of investigational drug.: AstraZeneca, BMS; Financial Interests, Institutional, Coordinating PI, Grant to institution for research within my laboratory.: CLS Therapeutics; Financial Interests, Institutional, Coordinating PI, Grant to institution for execution of research within my laboratory.: Protalix Biotherapeutics; Financial Interests, Institutional, Coordinating PI, Grant to institution for execution of multi-center clinical trial.: Roche; Financial Interests, Institutional, Coordinating PI, Grant to institution for execution of clinical trial.: Merck; Non-Financial Interests, Principal Investigator, Clinical trial chair for IND 242 Neoadjuvant Platform Trial in Patients with Surgically Resectable Non-Small Cell Lung Cancer (NSCLC): Canadian Cancer Trials Group. L. Thiberville: Financial Interests,

Institutional, Other, Board and expertise, invitation to medical congress: MSD, Sanofi, Chiesi, Pfizer. F.D.F. Chaves: Financial Interests, Institutional, Other, Local PI or SI of clinical trials: AstraZeneca, MSD, Xcovery, BMS, Lilly, Beigene; Financial Interests, Institutional, Invited Speaker, Local speaker: AstraZeneca, Servier, Takeda, Merck, MSD, Bayer. G. Liu: Financial Interests, Personal, Advisory Board: Anheart, Amgen, AstraZeneca, Bayer, EMD Serono, Jazz, Johnson and Johnson, MSD, Novartis, Pfizer, Roche, Sterimax, Takeda; Financial Interests, Personal and Institutional, Coordinating PI: Takeda, AstraZeneca. Research grants from Boehringer Ingelheim, Pfizer, AstraZeneca, Takeda. M. Okada: Financial Interests, Institutional, Funding, Funding for this study: MSD. H. Saji: Financial Interests, Personal and Institutional, Other, Payment or honoraria for lectures, presentations, speaker bureaus, manuscript writing, or educational events: MSD, Chugai Pharmaceutical, Astellas Pharma, Takeda, AstraZeneca, CSL Behring, TAIHO, Bristol Myers Squibb, Fujifilm Medical, Ethicon, and Covidien. K. Laktionov: Financial Interests, Personal, Invited Speaker, Speaker's Bureau: AstraZeneca, Roche, Biocad, Pfizer, Amgen, Swixx BioPharma; Non-Financial Interests, Advisory Role: AstraZeneca, Roche, Biocad, Pfizer, Amgen. A. Rittmeyer: Financial Interests, Personal, Advisory Board: AbbVie, AstraZeneca, BMS, Boehringer Ingelheim, Daiichi Sankyo, Gilead, GSK, MSD, Eli Lilly, Novartis, Pfizer, Roche. J. Bosch-Barrera: Financial Interests, Personal, Invited Speaker: MSD, BMS, AstraZeneca; Financial Interests, Personal, Advisory Board: Roche, Sanofi; Other, Relative (sister in law) working for this company: AstraZeneca. R.D. Gentzler: Financial Interests, Personal, Advisory Board: AstraZeneca, Takeda, Gilead, Janssen, Mirati, Daiichi Sankyo, Sanofi, Oncocyte, Jazz Pharmaceuticals, Merus; Financial Interests, Personal, Invited Speaker: Clinical Care Options, OncLive, Targeted Oncology, Society for Immunotherapy of Cancer (SITC), MedStar Health, Aptitude Health, American Society of Clinical Oncology (ASCO); Financial Interests, Institutional, Local PI: Janssen, Mirati, Daiichi Sankyo, Bristol Myers Squibb, AstraZeneca, Jounce Therapeutics, Takeda, Bristol Myers Squibb, Merck, Chugai, Amgen, Dizal; Financial Interests, Institutional, Research Grant: Pfizer; Financial Interests, Institutional, Coordinating PI: Mirati; Non-Financial Interests, Leadership Role, Co-chair, Thoracic Working Group: Hoosier Cancer Research Network; Non-Financial Interests, Principal Investigator: NCI ETCTN; Non-Financial Interests, Other, Member of Lung Cancer Scientific Review Committee: American Society of Clinical Oncology, Scientific Review Committee; Non-Financial Interests, Other, Committee Member: NCI Investigational Drug Steering Committee; Non-Financial Interests, Officer, Editor: Journal of Clinical Oncology: Meeting Abstracts; Non-Financial Interests, Other, World Conference on Lung Cancer 2024 Planning Committee: IASLC; Non-Financial Interests, Personal, Other, Travel support for attending meetings for invited speaker: International Association for the Study of Lung Cancer (IASLC); Non-Financial Interests, Personal, Other, Travel to meeting: Tempus, ASCO. A.K. Ganti: Financial Interests, Personal and Institutional, Coordinating PI, Institutional PI for clinical trials: MSD, Boehringer Ingelheim, Poseida Inc, Mirati Therapeutics; Financial Interests, Personal and Institutional, Speaker, Consultant, Advisor, Consultant: Jazz Pharmaceuticals, AstraZeneca, Regeneron Pharmaceuticals, Sanofi Genzyme, Cardinal Health, Flagship Biosciences, Mirati Therapeutics, Bayer. E. Jensen: Financial Interests, Personal, Full or part-time Employment: Merck Sharp & Dohme LLC, a subsidiary of Merck & Co., Inc., Rahway, NJ, USA; Financial Interests, Personal, Stocks/Shares, may own stock and/or hold stock options: Merck & Co., Inc., Rahway, NJ, USA. S.M. Keller: Financial Interests, Personal, Full or part-time Employment: Merck Sharp & Dohme LLC, a subsidiary of Merck & Co., Inc., Rahway, NJ, USA; Financial Interests, Personal, Stocks/Shares, may own stock and/or hold stock options: Merck & Co., Inc., Rahway, NJ, USA. A. Samkari: Financial Interests, Institutional, Full or part-time Employment: Merck Sharp & Dohme LLC, a subsidiary of Merck & Co., Inc., Rahway, NJ, USA; Financial Interests, Personal, Stocks/Shares, may own stock and/or hold stock options: Merck & Co., Inc., Rahway, NJ, USA. H. Wakelee: Financial Interests, Personal, Advisory Board, Served on a DSMC, completed November 2022: Mirati; Financial Interests, Personal, Invited Speaker, Develop and present a series of lectures: Fishawack Facilitate LTD; Financial Interests, Personal, Invited Speaker, Series of CME lectures: Medscape, Research to Practice; Financial Interests, Personal, Other, Discussion of new data at conferences: Curio Science; Financial Interests, Personal, Invited Speaker, Series of lectures/webinars for PER/OncLive: MJH Holdings; Financial Interests, Personal, Invited Speaker, CME lecture: Axis Medical Education, ParadigmMC, Prova Education; Financial Interests, Personal, Advisory Board: IOBiotech; Financial Interests, Personal, Invited Speaker, Facilitated speaking at several virtual conferences: Shanghai Bird Translation and Consulting; Financial Interests, Personal, Invited Speaker, Invited speaker at virtual symposium: China International Medical Foundation; Financial Interests, Personal, Invited Speaker, Invited to speak and moderate at JLCS meetings: Japanese Lung Cancer Society; Financial Interests, Personal, Invited Speaker, Presented at several CME conferences: Medical Educator Consortium; Financial Interests, Personal, Invited Speaker, Facilitated discussion of recent data: IDEology Health; Financial Interests, Personal, Invited Speaker, Invited CME lecture: Vindico Medical Education; Financial Interests, Personal, Invited Speaker, Invited speaker at symposium: Taiwan Association for the Study of Lung Cancer (TASLC); Financial Interests, Personal, Royalties, I receive royalties for a

chapter I wrote for UpToDate: UpToDate; Financial Interests, Institutional, Local PI, Clinical Trial Conduct: AstraZeneca/MedImmune, BMS, Seagen, Xcovery; Financial Interests, Institutional, Steering Committee Member, Clinical Trial Conduct: Genentech/Roche, Merck; Financial Interests, Institutional, Local PI, clinical trial conduct: Helsinn; Financial Interests, Institutional, Coordinating PI, IIT for single site: Bayer; Financial Interests, Personal, Steering Committee Member, uncompensated steering committee member: Merck, AstraZeneca, Genentech/Roche; Financial Interests, Personal, Other, uncompensated advisory board participation: BMS; Non-Financial Interests, Officer, Past President: International Association for the Study of Lung Cancer (IASLC); Non-Financial Interests, Leadership Role, Executive Committee: ECOG-ACRIN. All other authors have declared no conflicts of interest.

<https://doi.org/10.1016/j.annonc.2024.08.1269>

**1211P** **IMpower010: ctDNA status and 5y DFS follow up in patients (pts) with resected NSCLC who received adjuvant chemotherapy (chemo) followed by atezolizumab (atezo) or best supportive care (BSC)**

H. Wakelee<sup>1</sup>, M. Reck<sup>2</sup>, E. Felip<sup>3</sup>, N.K. Altorki<sup>4</sup>, E. Vallieres<sup>5</sup>, R. Liersch<sup>6</sup>, S. Oizumi<sup>7</sup>, H. Tanaka<sup>8</sup>, J.T. Hamm<sup>9</sup>, S. McCune<sup>10</sup>, E. Bennett<sup>11</sup>, B.J. Gitlitz<sup>12</sup>, V.A. McNally<sup>13</sup>, S. Novello<sup>14</sup>, M. Ballinger<sup>15</sup>, W. Zou<sup>16</sup>, B. Nabet<sup>17</sup>, M. Srivastava<sup>15</sup>, C. Zhou<sup>18</sup>

<sup>1</sup>Department of Oncology, Stanford University School of Medicine, Stanford Cancer Institute, Stanford, CA, USA; <sup>2</sup>Thoracic Oncology Department, Lung Clinic Grosshansdorf, Airway Research Center North, German Center for Lung Research, Grosshansdorf, Germany; <sup>3</sup>Department of Oncology, Vall d'Hebron University Hospital, Vall d'Hebron Institute of Oncology (VHIO), Barcelona, Spain; <sup>4</sup>Department of Cardiothoracic Surgery, New York-Presbyterian Hospital/ Weill Cornell Medical Center, New York, NY, USA; <sup>5</sup>Medical Oncology, Swedish Cancer Institute, Seattle, WA, USA; <sup>6</sup>Clinic for Hematology, Oncology and Palliative Medicine, Clemens Hospital Münster, Muenster, Germany; <sup>7</sup>Department of Respiratory Medicine, NHO Hokkaido Cancer Center, Sapporo, Japan; <sup>8</sup>Department of Internal Medicine, Niigata Cancer Center Hospital, Niigata, Japan; <sup>9</sup>Medical Oncology Department, Norton Cancer Institute, Louisville, KY, USA; <sup>10</sup>Research Dept., Northwest Georgia Oncology Centers, Marietta, GA, USA; <sup>11</sup>Product Development Oncology, Genentech, Inc. - Member of the Roche Group, South San Francisco, CA, USA; <sup>12</sup>PD0 Department, Genentech, Inc. - Member of the Roche Group, South San Francisco, CA, USA; <sup>13</sup>Clinical Science Department, Roche Products Limited, Welwyn Garden City, UK; <sup>14</sup>Department of Oncology, University of Turin, AOU S. Luigi Gonzaga, Turin, Italy; <sup>15</sup>Genentech, Inc. - Member of the Roche Group, South San Francisco, CA, USA; <sup>16</sup>Biostatistics Department, Genentech, Inc. - Member of the Roche Group, South San Francisco, CA, USA; <sup>17</sup>Oncology Biomarker Development, Genentech, Inc. - Member of the Roche Group, South San Francisco, CA, USA; <sup>18</sup>Medical Oncology Department, Tongji University Affiliated Shanghai Pulmonary Hospital, Shanghai, China

**Background:** In IMpower010 (NCT02486718), ctDNA+ status after surgery (post-op) was associated with poor prognosis; atezo was beneficial vs BSC regardless of post-op ctDNA status (Zhou ESMO-IO 2021). Post-chemo, ctDNA clearance (ctDNA-; 62% of post-op ctDNA+ pts) was associated with improved DFS; ctDNA levels were maintained in ctDNA+ pts, and conversion to ctDNA+ was delayed with atezo in ctDNA- pts (Felip ESMO-IO 2022). At final DFS and 2nd IA of overall survival (OS) with ≥5y of follow up, DFS benefit with atezo continued to translate into a positive OS trend vs BSC in PD-L1 tumour cell (TC) ≥1% and TC ≥50% stage II-IIIa pts. We report updated DFS and OS by ctDNA and PD-L1 status.

| Table: 1211P DFS and OS by ctDNA and PD-L1 status in stage II-IIIa ctDNA-evaluable pts |              |              |                |               |                   |
|----------------------------------------------------------------------------------------|--------------|--------------|----------------|---------------|-------------------|
| Group                                                                                  | ctDNA status | PD-L1 status | Median DFS, mo |               | HR (95%CI)        |
|                                                                                        |              |              | Atezo          | BSC           |                   |
| Post-op                                                                                | -            | All          | n=218<br>NE    | n=204<br>60.6 | 0.74 (0.56, 0.98) |
|                                                                                        |              | TC ≥1%       | n=124<br>NE    | n=98<br>52.6  | 0.60 (0.40, 0.89) |
|                                                                                        |              | TC <1%       | n=94<br>63.1   | n=106<br>66.7 | 0.97 (0.65, 1.44) |
|                                                                                        | +            | All          | n=53<br>19.1   | n=59<br>7.9   | 0.64 (0.42, 0.98) |
|                                                                                        |              | TC ≥1%       | n=36<br>21.8   | n=37<br>7.2   | 0.58 (0.34, 0.98) |
|                                                                                        |              | TC <1%       | n=15<br>5.0    | n=22<br>8.0   | 0.81 (0.38, 1.73) |
| Post-chemo <sup>a</sup>                                                                | -            | All          | n=36<br>34.2   | n=28<br>13.3  | 0.68 (0.37, 1.26) |
|                                                                                        | +            | All          | n=19<br>4.2    | n=20<br>4.0   | 0.64 (0.32, 1.26) |
|                                                                                        |              |              | Median OS, mo  |               | HR (95%CI)        |
| Post-op                                                                                | -            | TC ≥1%       | n=124<br>NE    | n=98<br>NE    | 0.68 (0.39, 1.19) |
|                                                                                        | +            | TC ≥1%       | n=36<br>68.5   | n=37<br>32.4  | 0.58 (0.32, 1.05) |

<sup>a</sup> In 103 evaluable post-op ctDNA+ pts CI, confidence interval; HR, hazard ratio; NE, not estimable
